# Supplementary material for: Synergistic antimicrobial effect of ascorbic acid and nicotinamide with rifampicin and vancomycin against SCCmec type IV methicillin-resistant Staphylococcus aureus (MRSA)
Source: PubMed Central journal article supplement (PMC9996180; doi:10.1099/acmi.0.000475.v4), 2023-02-03
Supplement: acmi-5-475.v4-s001.pdf [file acmi-5-475.v4-s001.pdf]

## Molecular Analysis – SCCmec typing results:

Table 1 Primers used for SCCmec typing with their corresponding types

| Target                 | Primer | Sequence (5'→'3)              | Product, bp | SCCmec Types: |    |     |    |   |
|------------------------|--------|-------------------------------|-------------|---------------|----|-----|----|---|
|                        |        |                               |             | I             | II | III | IV | V |
| <i>ccrA2-B</i>         | F      | ATTGCCTTGATAATAGCCYTCT        | 937         |               | ✓  |     | ✓  |   |
|                        | R      | TAAAGGCATCAATGCACAAACACT      |             |               |    |     |    |   |
| <i>ccrC</i>            | F      | CGTCTATTACAAGATGTTAAGGATAAT   | 518         |               |    | ✓   |    | ✓ |
|                        | R      | CCTTTATAGACTGGATTATTCAAAAATAT |             |               |    |     |    |   |
| IS1272                 | F      | GCCACTCATAACATATGGAA          | 415         | ✓             |    |     | ✓  |   |
|                        | R      | CATCCGAGTGAAACCCAAA           |             |               |    |     |    |   |
| <i>mecA-<br/>IS431</i> | F      | TATACCAAACCCGACAACACTAC       | 359         |               |    |     |    | ✓ |
|                        | R      | CGGCTACAGTGATAACATCC          |             |               |    |     |    |   |

## Multiplex PCR conditions:

Initial denaturation for 4 min at 94°C, followed by 30 cycles of denaturation (30 s at 94°C), annealing (30 s at 55°C) and extension (60 s at 72°C), and a final extension for 4 min at 72°C. Electrophoresis was performed on a 1.5% agarose gel via ethidium bromide staining, afterwards the gel was visualized under ultraviolet illumination

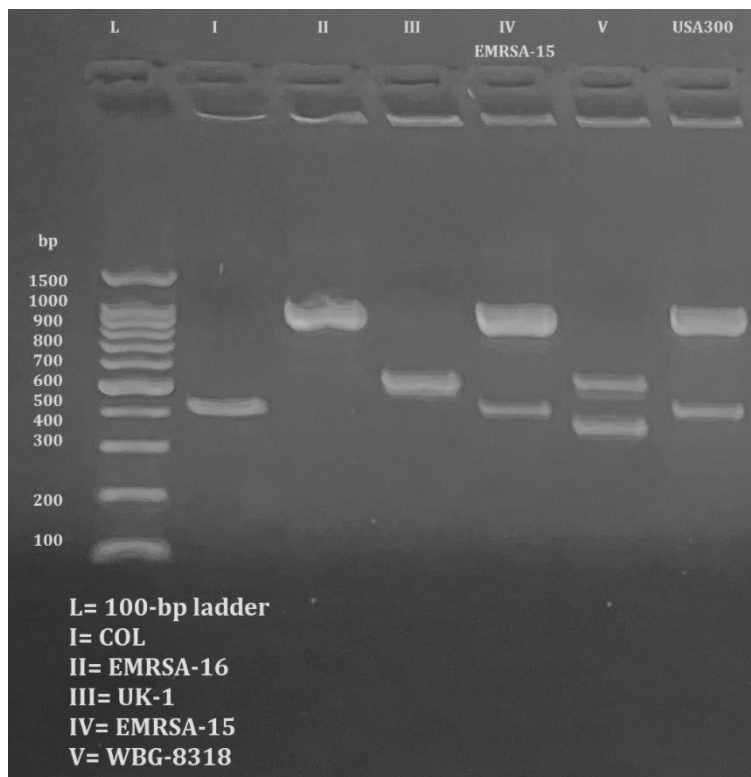

Figure 1 SCCmec typing for the reference strains. Specific genes were targeted in this multiplex PCR assay: *IS1272* for type I (415bp), *ccrA2-B* for type II (937bp), *ccrC* for type III (518bp), *ccrA2-B* and *IS1272* for type IV (937bp and 415bp, respectively) and *ccrC* and *mecA-IS431* for type V (518bp and 359bp, respectively). 100-bp ladder (Promega, USA) was used in this assay.

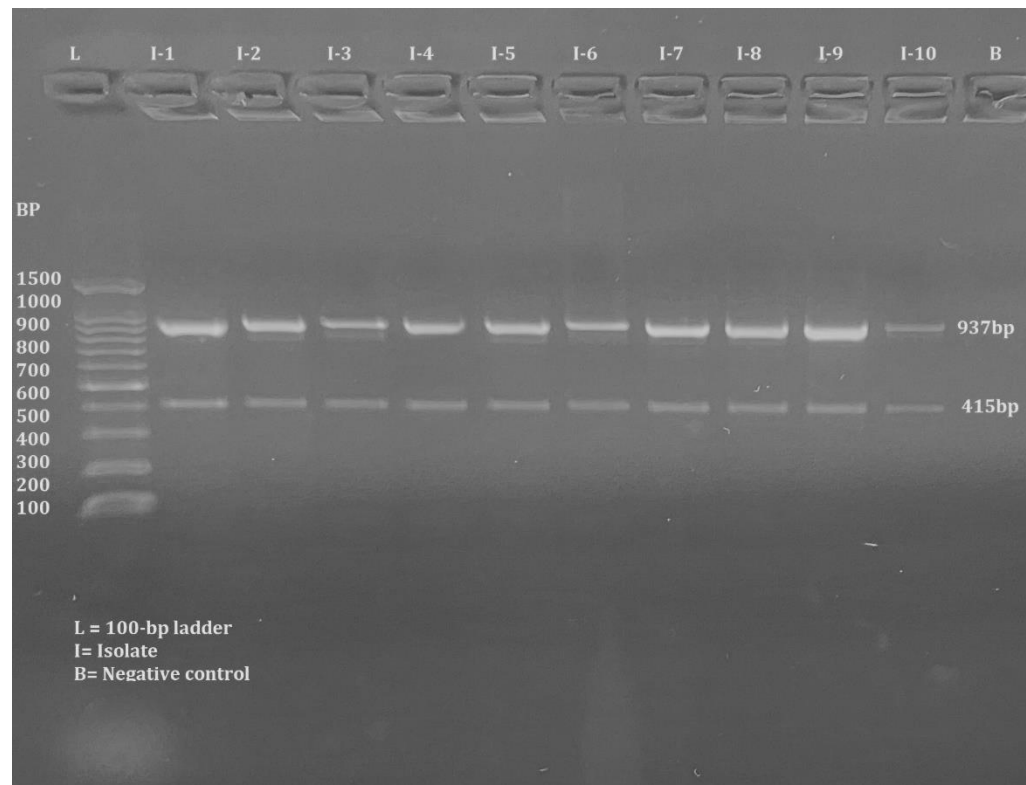

Figure 2 SCCmec typing for the 10 clinical isolates. Specific genes were targeted in this multiplex PCR assay: *IS1272* for type I (415bp), *ccrA2-B* for type II (937bp), *ccrC* for type III (518bp), *ccrA2-B* and *IS1272* for type IV (937bp and 415bp, respectively) and *ccrC* and *mecA-IS431* for type V (518bp and 359bp, respectively). 100-bp ladder (Promega, USA) was used in this assay.
